# Supplementary material
Source: Springer Nature journal article supplement (https://www.springermedizin.de/resource/supplementary/12943_2013_1161_MOESM6_ESM.pdf/9552632)

**A**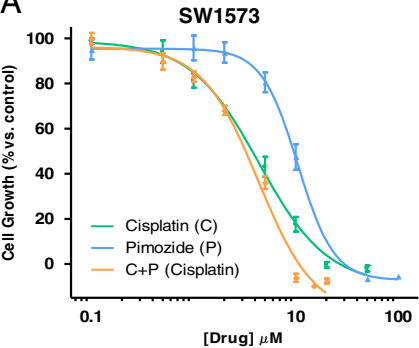**B**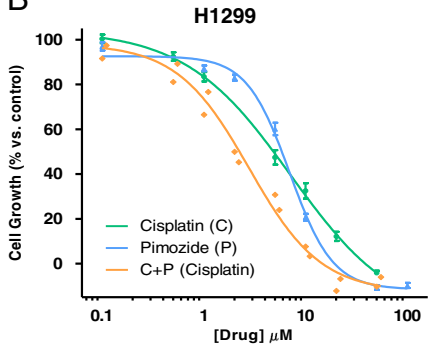**Combination Index (CI)**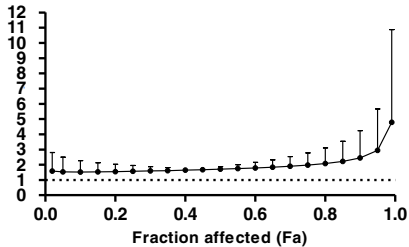**Combination Index (CI)**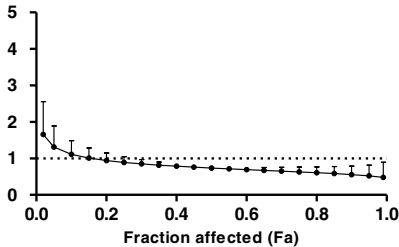

Supplement: MOESM6 [file 9552632]
